# Supplementary material for: The orientation design of high-polarity ligand dipole CF3-PEA for enhancing the surface stability and optoelectronic properties of the FAPbI3 perovskite
Source: Royal Society of Chemistry journal article supplement (doi:10.1039/d5cp00612k), 2025-01-01
Supplement: d5cp00612k1.pdf [file d5cp00612k1.pdf]

## Supplementary Information

# The orientation design of high-polarity ligand dipole CF<sub>3</sub>-PEA for enhancing surface stability and optoelectronic properties of FAPbI<sub>3</sub> perovskite

Xiuchen Han <sup>a</sup>, Qi Yang <sup>b</sup>, Shuning Wang <sup>a</sup>, Xinyue Zhang <sup>a</sup>, Dongmeng Chen <sup>a</sup>, Peiwen Xiao <sup>c, d</sup>

Wenjing Fang <sup>a,\*</sup>, Bing Liu <sup>a,b,\*</sup>

<sup>a</sup> College of Science, China University of Petroleum (East China), Qingdao 266580, P. R. China.

<sup>b</sup> College of Pipeline and Civil Engineering, China University of Petroleum (East China), Qingdao 266580, P. R. China.

<sup>c</sup> Research Institute of Petroleum Exploration & Development, PetroChina, Beijing 100083, China;

<sup>d</sup> Key Laboratory of Nano Chemistry, China National Petroleum Corporation, Beijing 100083, China;

\*Corresponding authors.

E-mail addresses: [fangwj@upc.edu.cn](mailto:fangwj@upc.edu.cn) (W.J. Fang), [liubing19720115@gmail.com](mailto:liubing19720115@gmail.com) (B. Liu).

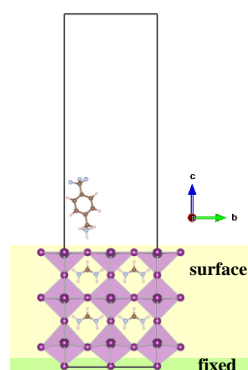

**Fig. S1.** The crystal structure of FAPbI<sub>3</sub> perovskite adsorbed by CF<sub>3</sub>-PEA.

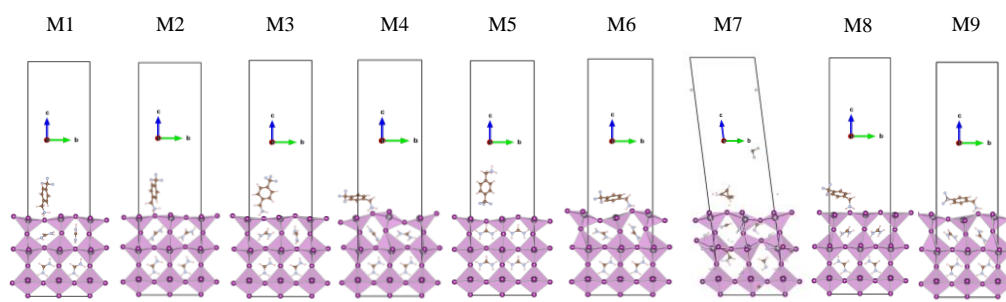

**Fig. S2.** The front view of atomic structure of surface adsorption systems M1-M9 after structural optimization.

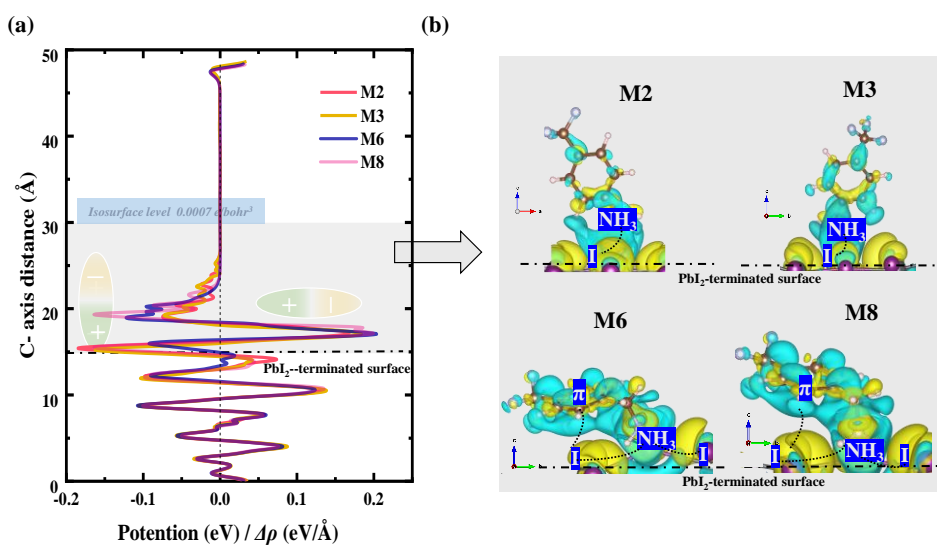

**Fig. S3.** (a) C-axis potential distribution and (b) Charge density difference (isosurface value of 0.0007 e/bohr<sup>3</sup>; blue indicates electron depletion; yellow indicates electron accumulation) for systems M2, M3, M6, and M8.

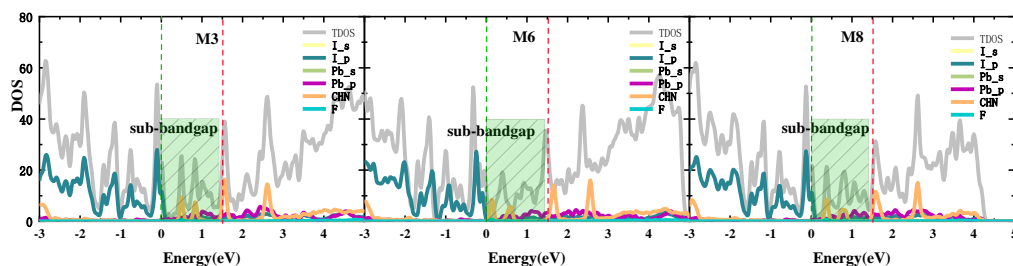

**Fig. S4.** Density of state of systems containing M3, M6, and M8, where VBM is corrected to be 0 eV.

**Table S1.** Adsorption Position with Adsorption Site and the corresponding Crystal Plane of adsorption systems M1-M6, and M8-M9.

|    | Adsorption Position Description                                                                                                                                                                        | Adsorption Site | Crystal Plane |
|----|--------------------------------------------------------------------------------------------------------------------------------------------------------------------------------------------------------|-----------------|---------------|
| M1 | Vertical adsorption of positive dipole; -<br>NH <sub>3</sub> group located above C <sub>3</sub>                                                                                                        | C <sub>3</sub>  | [1, -1, -2]   |
| M2 | Vertical adsorption of positive dipole; -<br>NH <sub>3</sub> group located above C <sub>3</sub>                                                                                                        | C <sub>3</sub>  | [2, -1, -4]   |
| M3 | Vertical adsorption of positive dipole; -<br>NH <sub>3</sub> group located above C <sub>3</sub>                                                                                                        | C <sub>3</sub>  | [-2, -1, -5]  |
| M4 | Parallel adsorption of dipole; -NH <sub>3</sub> group<br>located above C <sub>3</sub> ; -CF <sub>3</sub> group is further<br>from the FAPbI <sub>3</sub> surface, directly above<br>the A <sub>2</sub> | C <sub>3</sub>  | [2, 4, -1]    |
| M5 | Vertical adsorption of negative dipole; -<br>CF <sub>3</sub> group located above A <sub>2</sub>                                                                                                        | A <sub>2</sub>  | [0, 0, 1]     |
| M6 | Parallel adsorption of dipole; -NH <sub>3</sub> group<br>located above C <sub>3</sub> ; -CF <sub>3</sub> group is further<br>from the FAPbI <sub>3</sub> surface, directly above<br>the A <sub>2</sub> | C <sub>3</sub>  | [2, 4, 1]     |
| M8 | Parallel adsorption of dipole; -NH <sub>3</sub> group<br>located above C <sub>3</sub> ; -CF <sub>3</sub> group is further<br>from the FAPbI <sub>3</sub> surface, directly above<br>the A <sub>2</sub> | C <sub>3</sub>  | [1, 1, -3]    |
| M9 | Parallel adsorption of dipole; -NH <sub>3</sub> group<br>located above C <sub>3</sub> ; -CF <sub>3</sub> group is further<br>from the FAPbI <sub>3</sub> surface, directly above<br>the A <sub>2</sub> | C <sub>3</sub>  | [1, 3, -1]    |

**Table S2.** The values of  $E_{\text{tot}}$ ,  $\Delta E_{\text{tot}}$ ,  $E_{\text{ad}}$ , and  $E_{\text{form}}$  of Bare-FAPbI<sub>3</sub> and surface adsorption systems M1-M6, and M8-M9, respectively.

|                         | $E_{\text{tot}}$ (eV) | $\Delta E_{\text{tot}}$ (eV) | $E_{\text{ad}}$ (eV) | $E_{\text{form}}$ (eV) |
|-------------------------|-----------------------|------------------------------|----------------------|------------------------|
| Bare-FAPbI <sub>3</sub> | -244.57               | 128.01                       | -                    | -0.485                 |
| M1                      | -372.42               | 0.16                         | -4.03                | -0.743                 |
| M2                      | -372.33               | 0.25                         | -3.88                | -0.740                 |
| M3                      | -372.36               | 0.22                         | -3.85                | -0.742                 |
| M4                      | -372.58               | 0                            | -4.14                | -0.746                 |
| M5                      | -369.05               | 3.53                         | -0.42                | -0.477                 |
| M6                      | -372.52               | 0.06                         | -4.08                | -0.740                 |
| M8                      | -372.33               | 0.25                         | -4.08                | -0.728                 |
| M9                      | -372.50               | 0.08                         | -4.06                | -0.740                 |

**Table S3.** Minimum potential gradient ( $\Delta\rho_{\text{Min}}$ ), maximum potential gradient ( $\Delta\rho_{\text{Max}}$ ), and the resulting potential gradient span ( $\Delta G = \Delta\rho_{\text{Max}} - \Delta\rho_{\text{Min}}$ ) along the c-axis direction for systems M1-M6, and M8-M9.

|    | $\Delta\rho_{\text{Min}}$ (eV/Å) | $\Delta\rho_{\text{Max}}$ (eV/Å) | $\Delta G$ (eV/Å) |
|----|----------------------------------|----------------------------------|-------------------|
| M1 | -0.124                           | 0.136                            | 0.260             |
| M2 | -0.124                           | 0.164                            | 0.288             |
| M3 | -0.163                           | 0.184                            | 0.347             |
| M4 | -0.129                           | 0.201                            | 0.330             |
| M5 | -0.044                           | 0.099                            | 0.143             |
| M6 | -0.123                           | 0.204                            | 0.327             |
| M8 | -0.169                           | 0.199                            | 0.368             |
| M9 | -0.103                           | 0.209                            | 0.312             |

**Table S4.** Work function (WF), Fermi level, vacuum level, and  $\Delta WF$  for both the bare FAPbI<sub>3</sub> and the adsorption systems M1-M6 and M8-M9.  $\Delta WF = WF_{\text{bare FAPbI}_3} - WF_{\text{system}}$ .

|                         | WF (eV) | Fermi Level (eV) | Vacuum Level (eV) | $\Delta WF$ (eV) |
|-------------------------|---------|------------------|-------------------|------------------|
| Bare FAPbI <sub>3</sub> | 6.764   | -3.505           | 3.259             | 0                |
| M1                      | 6.762   | -1.636           | 5.126             | 0.002            |
| M2                      | 6.731   | -1.818           | 4.913             | 0.033            |
| M3                      | 6.739   | -1.833           | 4.906             | 0.025            |
| M4                      | 6.743   | -1.425           | 5.318             | 0.021            |
| M5                      | 7.331   | -1.991           | 5.340             | -0.567           |
| M6                      | 6.773   | -1.281           | 5.492             | -0.009           |
| M8                      | 6.734   | -1.605           | 5.129             | 0.03             |
| M9                      | 6.74    | -1.468           | 5.272             | 0.024            |
